# Supplementary material for: An Analysis of Polymorphisms Within the Wnt Signaling Pathway in Relation to Ovarian Cancer Risk in a Polish Population
Source: Springer Nature journal article supplement (doi:10.1007/s40291-013-0059-y), 2013-09-27
Supplement: MOESM4 [file 24436172]

**Supplementary Table 1.**

**Characteristics of Polymorphisms Genotyped in the Data Set.**

| **Gene symbol** | **Gene name** | **rs no.** | **HGVS Namea** | **SNP functionb** | **MAFc** |
| --- | --- | --- | --- | --- | --- |
| ***CTNNB1*** | catenin (cadherin-associated protein), beta 1 | rs4533622 | c.-49+1177C>A | intron | 0.46 |
| 3p22.1 |  | rs2953 | c.*250T>G | UTR-3 | 0.46 |
| ***APC*** | adenomatous polyposis coli | rs11954856 | c.-18-3243T>G | intron | 0.48 |
| 5q22.2 |  | rs351771 | c.1635G>A | cds-synon (Ala545Ala) | 0.45 |
|  |  | rs459552 | c.5465T>A | missense (Val1822Asp) | 0.30 |
| ***AXIN2*** | axis inhibition protein 2 | rs4074947 | c.2406-1000C>T | intron | 0.19 |
| 17q24.1 |  | rs7224837 | c.2406-1903C>T | intron | 0.15 |
|  |  | rs3923087 | c.816-3483A>G | intron | 0.22 |
|  |  | rs2240308 | c.148C>T | missense (Pro50Ser) | 0.49 |

aHuman Genome Variation Society

bAccording to the Single Nucleotide Polymorphism database (dbSNP).

cMAF, minor allele frequency calculated from the control samples.
